# Supplementary material
Source: Springer Nature journal article supplement (https://www.springermedizin.de/resource/supplementary/12967_2009_339_MOESM1_ESM.pdf/9576258)

25(OH)D (ng/mL)

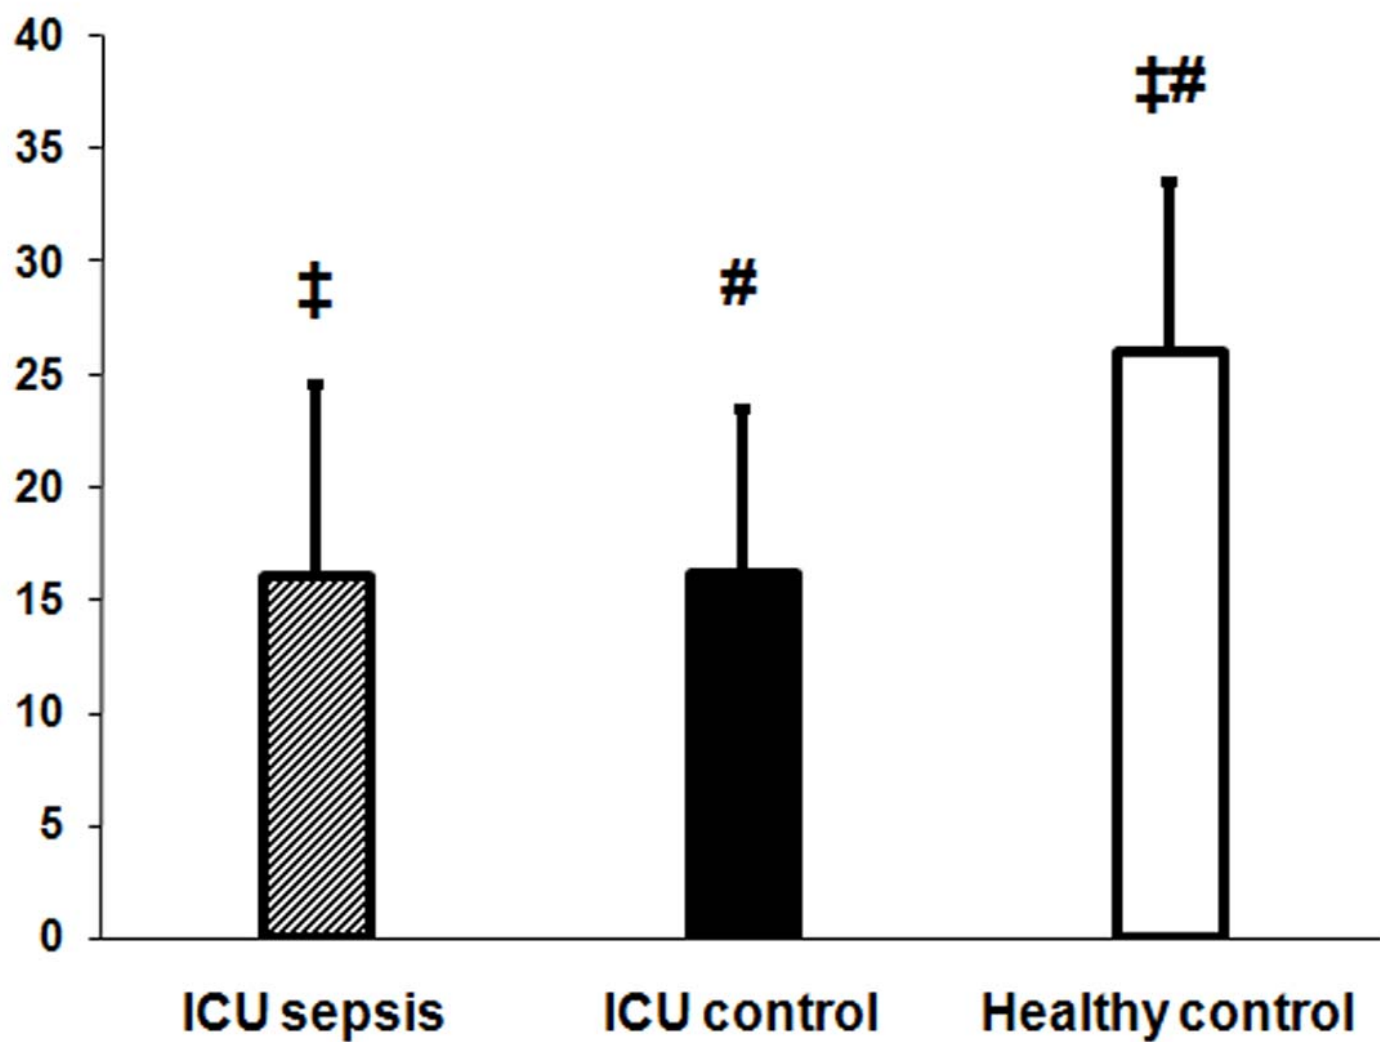

Supplement: MOESM1 [file 9576258]
